# Supplementary material
Source: Springer Nature journal article supplement (https://www.springermedizin.de/resource/supplementary/12885_2009_1881_MOESM4_ESM.pdf/9461476)

**Fold difference**

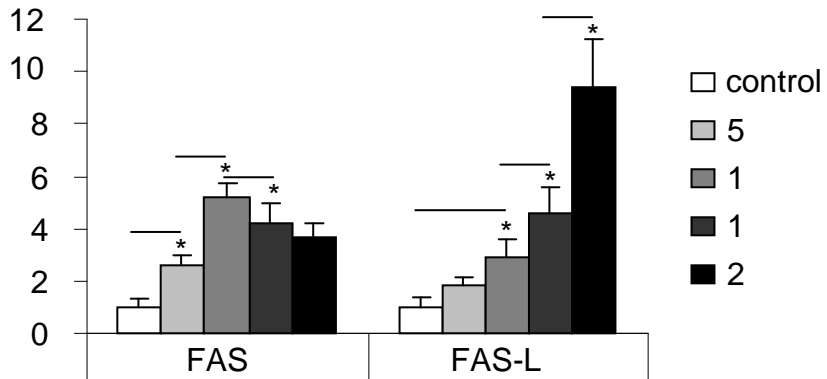

|                       |         |         |
|-----------------------|---------|---------|
| □ normal liver tissue | 1.0±0.3 | 1.0±0.4 |
| ■ 5                   | 2.6±0.3 | 1.8±0.3 |
| ■ 1                   | 5.1±0.5 | 2.9±0.6 |
| ■ 1                   | 4.2±0.7 | 4.6±0.9 |
| ■ 2                   | 3.7±0.5 | 9.4±1.8 |

**positive cells [%]**

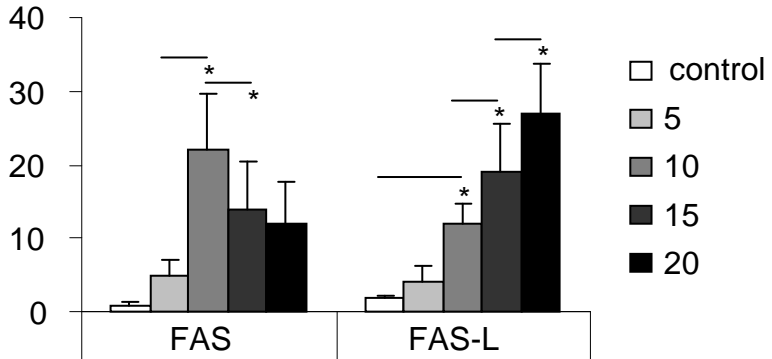

|                       |        |        |
|-----------------------|--------|--------|
| □ normal liver tissue | 1±0.4  | 2±0.40 |
| ■ 5                   | 5±2.3  | 4±2.3  |
| ■ 10                  | 22±7.5 | 12±2.7 |
| ■ 15                  | 14±6.5 | 19±6.5 |
| ■ 20                  | 12±5.7 | 27±6.7 |

Supplement: MOESM4 [file 9461476]
